# Supplementary material
Source: MDPI journal article supplement (https://www.mdpi.com/2073-4441/13/10/1409)
Supplement: s1 [file s1]

## Supplementary Material

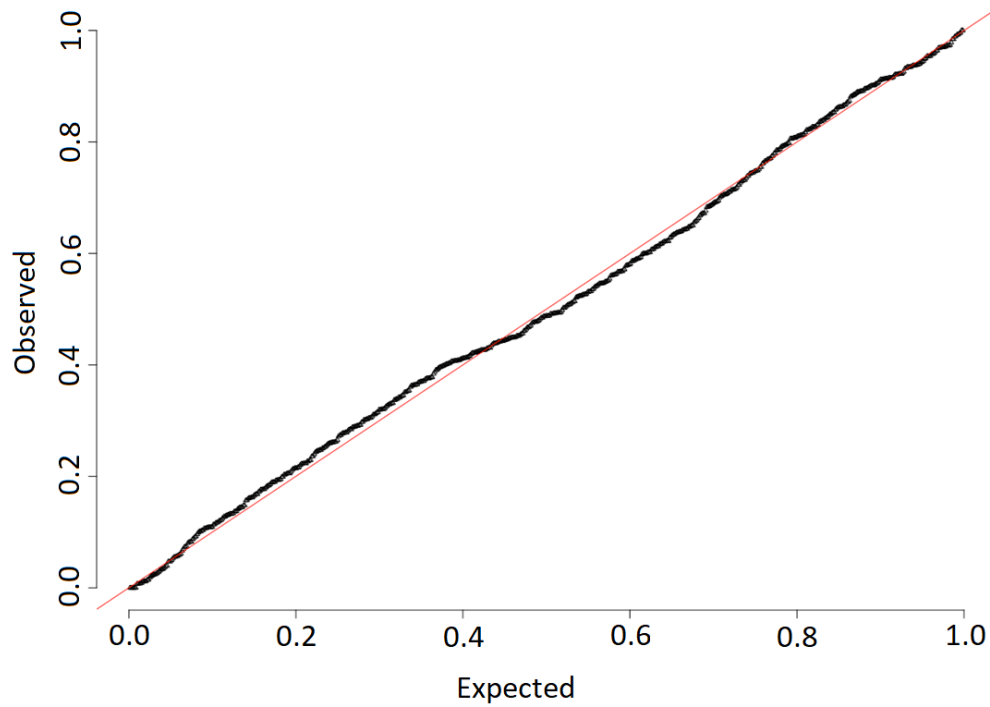

**Figure S1.** Graph comparing expected vs observed residuals for the regression equation:  $TD-700\ Chl-a = 1.7962 + (0.5897 \times FluoroSense\ reading) + (0.1862 \times Turbidity)$ . The 1:1 line is red, and residuals appear as separate points along this line.

**Table S1.** Summary of ANOVA results testing differences between TD-700 and FlouoroSense probe *chl-a* concentration readings with algal concentration, turbidity, the interaction between concentration and turbidity (Concentration \* Turbidity), lake identity (different algal assemblages), and light vs dark treatment (Lumen) parameters. F values and *p* values are listed. Bold indicates significant *p* values with  $\alpha < 0.05$ .

| Parameter                 | F Value  | <i>p</i> Value    |
|---------------------------|----------|-------------------|
| Concentration             | 17094.15 | <b>&lt; 0.001</b> |
| Turbidity                 | 1509.37  | <b>&lt; 0.001</b> |
| Concentration * Turbidity | 397.36   | <b>&lt; 0.001</b> |
| Lake Identity             | 45.78    | <b>&lt; 0.001</b> |
| Lumen                     | 2.77     | 0.097             |
